# Supplementary material
Source: PubMed Central journal article supplement (PMC5007770)
Supplement: AEM.01724-16_zam999117412so1.pdf [file AEM.01724-16_zam999117412so1.pdf]

## A

|     |                  |                                                                                                                        |
|-----|------------------|------------------------------------------------------------------------------------------------------------------------|
| 79% | RsmA (PAO1)      | <b>MLILTRRV</b> GET <b>FLMVG</b> DDV <b>TVTVL</b> GVKGN <b>QVR</b> IGV <b>NAPKEVAVH</b> REEI <b>YQRI</b> QKEKDQEPNH    |
|     | PP_4472 (KT2440) | MLILTRRCAESLIIGDGEITVTVLVGVKGNQVRIGV <b>SAPKEVAVH</b> REEI <b>YLRIK</b> KEKDEEPSL                                      |
| 95% | RsmA (F113)      | MLILTRRCAESLIIGDGEITVTVLVGVKGNQVRIGV <b>NAPKEVAVH</b> REEI <b>YLRIK</b> KEKDEPSH                                       |
| 61% | RsmA (PAO1)      | <b>MLILTRRV</b> GET <b>FLMVG</b> DDV <b>TVTVL</b> GVKGN <b>QVR</b> IGV <b>NAPKEVAVH</b> REEI <b>YQRI</b> QKEKDQEPNH    |
|     | PP_3832 (KT2440) | MLILTRK <b>VGESIV</b> INDDIKV <b>TILGVKGMQVR</b> IGIDAPKDVQ <b>VHREEIFKRI</b> QAGSP <b>AP</b> EKHEDTH                  |
| 72% | RsmE (F113)      | MLILTRK <b>VGESIN</b> IGDDIT <b>ITILGV</b> SG <b>Q</b> QVRIGINAPK <b>N</b> AVHREEI <b>YQRI</b> QAGLTAP <b>DKPQ</b> -TP |
| 43% | RsmA (PAO1)      | <b>MLILTRRV</b> GET <b>FLMVG</b> DDV <b>TVTVL</b> GVKGN <b>QVR</b> IGV <b>NAPKEVAVH</b> REEI <b>YQRI</b> QKEKDQEPNH    |
|     | PP_1746 (KT2440) | MLVIGRE <b>VGEVIV</b> IGDDIRIM <b>VVETRD</b> GVVRFV <b>GAAPREVPVHRAE</b> VYKRI---KASKQSKA                              |
| 59% | RsmI (F113)      | MLVLSRA <b>VGELIS</b> IGDDI <b>SVR</b> VLSV <b>SGGT</b> VRFGVEAPRHVDVHRSEI <b>YDKIQ</b> RKALATRKAC <b>SVE</b>          |

## B

|                |                                                                                                        |
|----------------|--------------------------------------------------------------------------------------------------------|
| RsmA (PP_4472) | <b>MLILTRR</b> CAESLIIGDGEITVTVLVGVKGNQVRIGV <b>SAPKEVAVH</b> REEI <b>YLRIK</b> KEKDEEPSL              |
| RsmE (PP_3832) | MLILTRK <b>VGESIV</b> IND-DIKV <b>TILGVKGMQVR</b> IGIDAPKDVQ <b>VHREEIFKRI</b> QAGSP <b>AP</b> EKHEDTH |
| RsmI (PP_1746) | MLVIGRE <b>VGEVIV</b> IGD- <b>DIRIMV</b> ETRDGVVRFV <b>GAAPREVPVHRAE</b> VYKRIKASKQSKA                 |

## C

*rsmY P. protegens* Pf-5 vs. intergenic PP\_0370-PP\_0371

ATGGACGTCGCAGGAAAGCGCAAAGCAAACACGGACACCTAGGATT-CC-GCCAGGATGGTGGAGTGAAAAGGATGTCA--GGGA  
TTGGCGCAGGAAGCGCAAAGGACAGATCAAGGACGACGAC--GAAGGACCCTGCCAGGATGGCGGGCGATACGGATGTCAAGGGA  
**AACAGTCTGCAAAGCCCCGCTTCGGCGGGGTTTT**  
**AACAGTCTGAAAACCCCCTTCGGCGGGGTTTT**

*rsmZ P. protegens* Pf-5 vs. intergenic PP\_1624-PP\_1625

TGTCGACGGATAGACACAGCCATCAAGGACGATGGTCA-GGACATCGCAGGAAGCGA-TTCATCAGGACGATGAAAAGGAACA-CAG  
TGCACAGGGACAATGCACAGGCTTTCAGGATGAAGGCCAGGGACATCGCAAAGGCGATTTCATCAGGATGATGTTTGGGACAAAGCAG  
**GGACTAGGGAAAAA--TGTGGGCGGGTCAATACCGCCCCCTTTTTT**  
**GGACTACGGAAAAAATGTGGGCGGGTCAAACCGCCCCCTTTTTT**

*rsmX P. fluorescens* F113 vs. intergenic PP\_0214-PP\_0215 (reverse complement.)

←PP\_0215 TGGGGCTGCAGCGCTCATCGCCA**ACTACTCTGAATAACCTGACACACAGTCCGT-CGCAGCTTCAAAGCCAGTCCTCC**  
TGGACT-CATCCA**CTGAAGCACAGGAAGTGCTCAGGATCAGGGACGA-TCGACC**  
TTGCAAGGAAAGCTATCGACAGGGAGTCGTAATGGTCTTGGAAAAACCGCTTCGGCGGGTTTTTT  
-GATA**ACCATAGC--GCCACACGGCTT-ATCTGGGCA**TAAAAAAAACCGCTT**AGCGGGTTTTTT**CTGAAGCGCGTCACA**TCA** ←PP\_0214

**Figure S1. A)** Alignment and percent identities of each Rsm protein of *P. putida* KT2440 with RsmA of *P. aeruginosa* and their respective homolog in *P. fluorescens* F113. **B)** Amino acid sequence comparison between the three Rsm family proteins of *Pseudomonas putida* KT2440. In both panels A and B, yellow and turquoise shading indicate identical residues and conservative changes, respectively. Residues involved in mRNA recognition are shown in magenta boldface (Schubert M, Lapouge K, Duss O, Oberstrass FC, Jelesarov I, Haas D, Allain FH. 2007. Molecular basis of messenger RNA recognition by the specific bacterial repressing clamp RsmA/CsrA. Nat Struct Mol Biol 14:807-813). **C)** Identification of chromosomal regions encoding small RNAs *rsmY*, *rsmZ* and putative *rsmX* in *P. putida* KT2440, by comparison with the corresponding sequences of *P. protegens* Pf-5 and *P. fluorescens* F113. Identical nucleotides are shaded in yellow. Start and stop codons of PP\_0215 and PP\_0214 are underlined and shown in blue and red, respectively.

**A**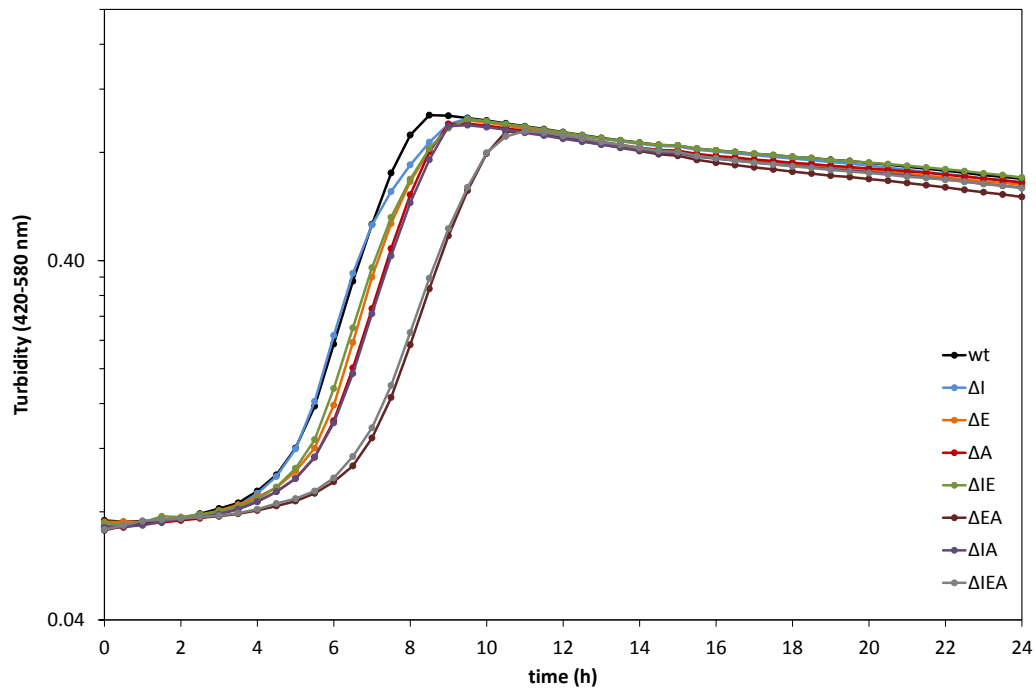**B**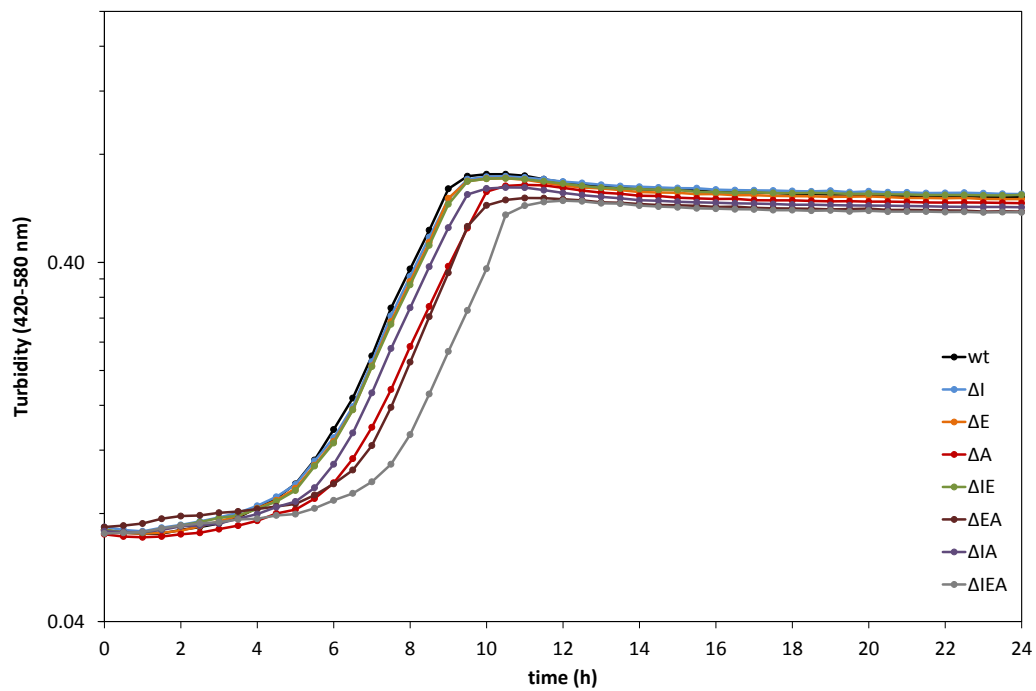

**Figure S2.** Growth of wild type KT2440 (wt) and *rsm* mutants in minimal medium with 10 mM citrate (A) or 5 mM glucose (B) as carbon source. Cultures grown overnight were inoculated in multiwell plates at an initial  $OD_{600}$  of 0.05, in triplicate. Turbidity was monitored every 30 minutes during growth at 30°C in a BioScreen. Average growth curves of each strain are shown, from three technical replicas. Error bars are omitted for clarity, in all cases the standard error was below 5%.

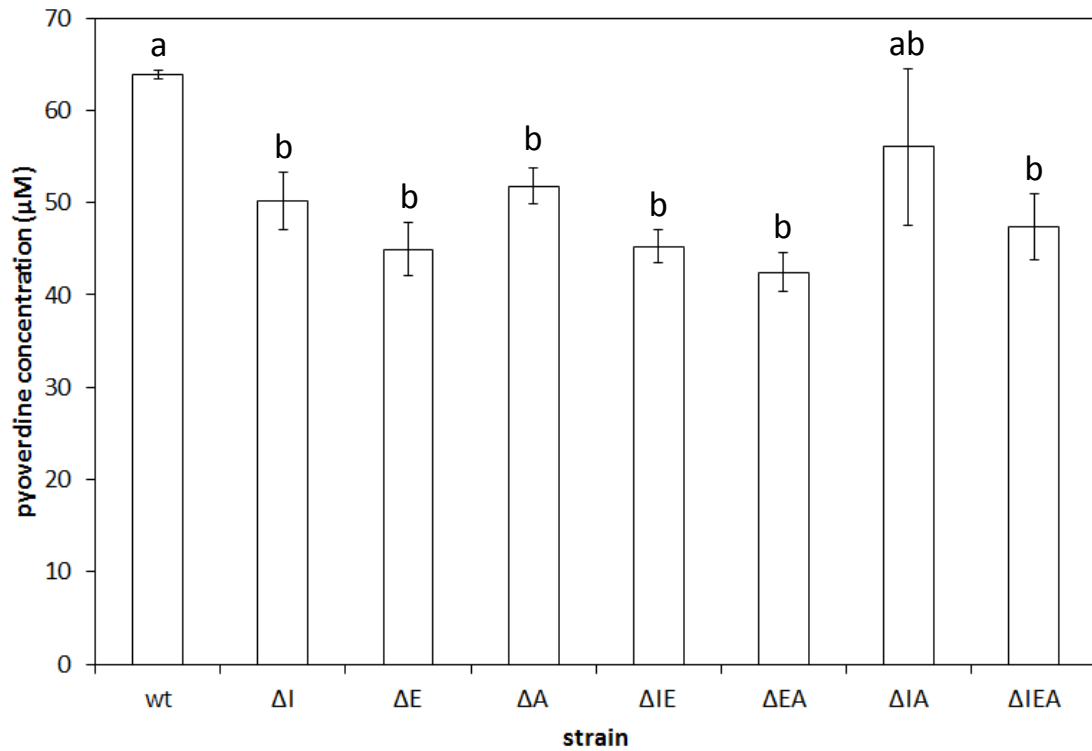

**Figure S3.** Pyoverdine concentration in supernatants of cultures grown overnight in King's B medium, calculated by measuring absorbance at 405 nm (molar extinction coefficient of pyoverdine =  $1,9 \times 10^{-4} \text{ M}^{-1} \times \text{cm}^{-1}$ ). Data are averages and standard deviations of three biological replicas with three technical replicas each, normalized to  $\text{OD}_{660} = 1$  to correct for potential growth differences between cultures. Different letters are indicative of statistically significant differences between datasets (1-way ANOVA,  $p < 0.05$ ).

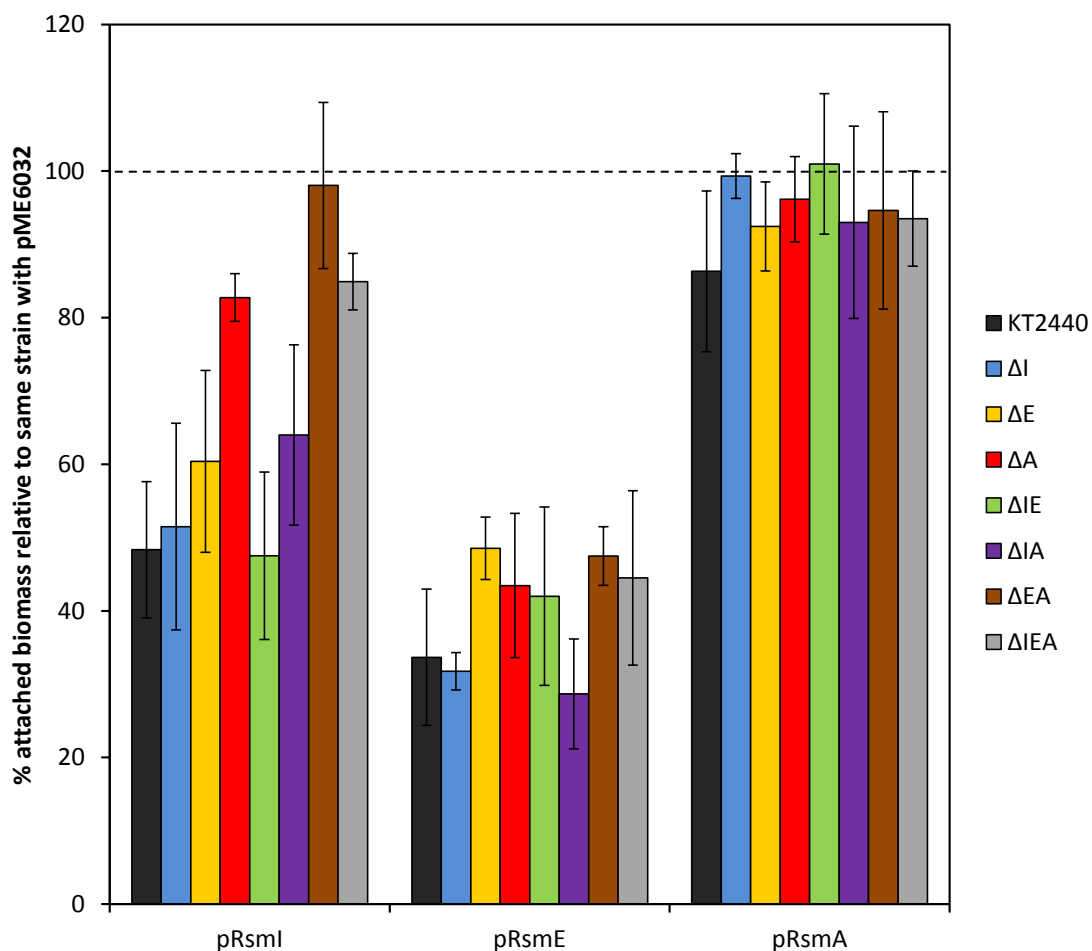

**Figure S4.** Quantitative analysis of the influence of overexpressing each Rsm protein on biofilm formation by KT2440 and *rsm* mutant backgrounds. Attached biomass (see Fig. 5) was quantified by measuring absorbance at 580 nm after crystal violet staining and solubilization of the dye with 30% acetic acid. Values are given in percentage relative to the same strain carrying the empty vector pME6032, which corresponds to a value of 100% (Averages and S.D. from three different experiments).

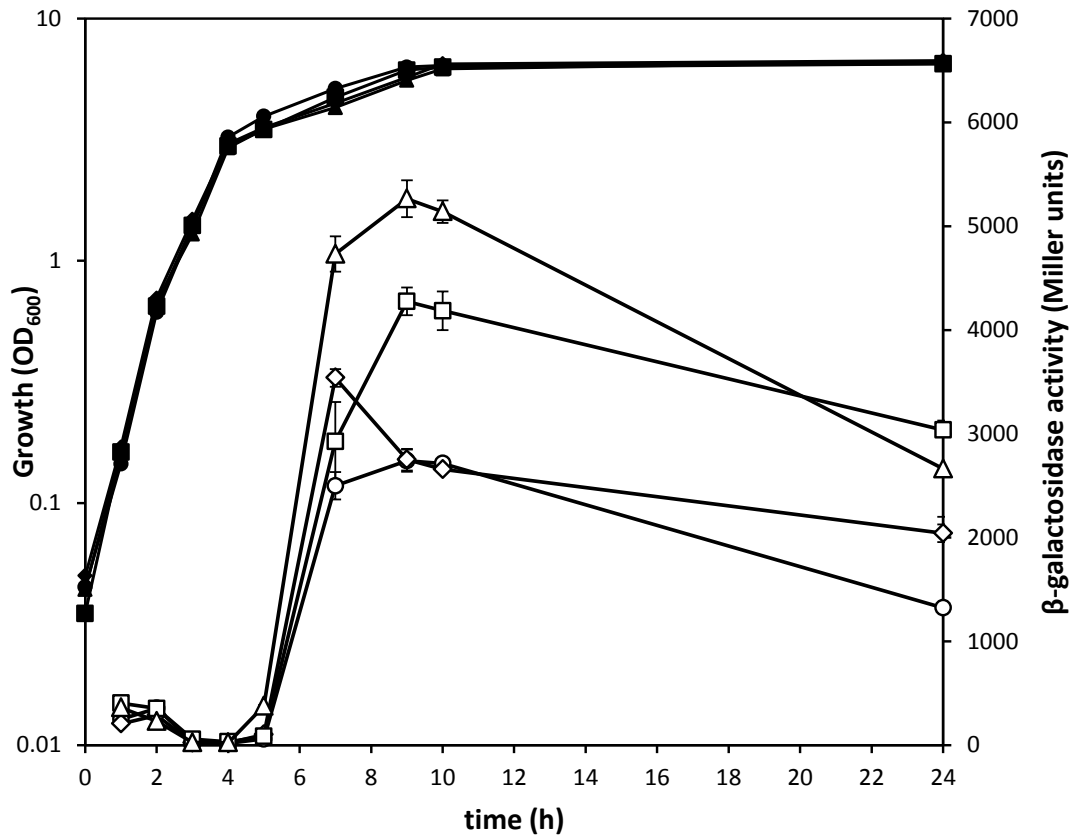

**Figure S5.** Influence of Rsm proteins on *lapF* expression. Growth (closed symbols) and  $\beta$ -galactosidase activity (open symbols) of KT2440 (circles) and mutants  $\Delta I$  (diamonds)  $\Delta E$  (squares) and  $\Delta A$  (triangles), carrying the *lapF::lacZ* fusion in pMMG1. Data are averages and standard deviations from two biological replicas with two technical replicas.

```

>rsmI
[ GCGGCTGTATGACGAGATGGCCGAAATGGCGGTGAAAAATGCGGGCAAAGCCCCGTGCGGATGATTGGTCTGTAGGA
GTAGTTACTCAAAGTGTAAGAGGCTTCTGAATTGCAGTGGAACTATTGAGTAGCTGAATGCCTACGGGGCAGGCTCC
GGTTTTCCCTTTCGCAGGAGGATCGGAACATGCTGGTAATAGGGCGCGAAGTAGGG ]

>rsmE
[ GGCCTTGCTGTTGTTTTCTTCAGGCACCTGAGGAACAGGAGGACCATTGAGCTTGTCTATTAGCCCATGATGCGAAG
AAATTTCCCATTAGCCGCCAACCCCCTATTCTGCCAGCGAGGCACCTTGGCCGACAAA [ CCGTTGACGGTTTGCTTT
GGCACCTGCAACTGAAGACACGCAACAGAATTTGTCTGTCTGGGGAATTACTATCCGCCGAAAGCGTCTTTAATGAGAA
GGAAGAGGGACAAGCTCCCCGCCCGCGGCAACTAGCCAGCGGACTTATACATCACCAAGGAGAACTACATGCTGAT
ACTCACCCGTAAGGTTGGC ]

>rsmA
[ CTTCCAGGGCGTCGACGAGCACGGCAGCATCACTACCCTGGGTGCTGGTGGCTCTGATACCACCGGCGTGGCCCTGG
CGGCGGCGCTGAAGGCTGATGAGTGCCAGATCTACACTGATGTTGATGGCGTCTACACCACCGACCCGCGCTGCTGC
CACAGGCCGTCGCTGGAGAAGATCACCTTCGAAGAGATGCTGGAATGGCCAGCCTTGGTTCCAAGGTGCTGCAGA
TCCGTTCCGGTGGAGTTTCGCCGGCAAGTACAACGTTCCGCTGCGCGTGTGCACAGCTTCAAGGAGGGTCCGGGTACCC
TCATTACCATTGATGAAGAGGAATCCATGGAACAGCCGATCATTCCGGTATCGCCTTCAACCGTGATGAAGCAAAGC
TGACCATTGCGGGCGTGCCGATACCCCGGGCGTGGCCTTCAAGATCCTCGGCCGATCAGCGCTTCAACATCGAAG
TCGACATGATCGTGCAGAACGTTGCGCACGATAACACCACCGACTTCACCTCACCGTGCACCGAATGAGTACGAGA
AGGCGCAGAGCGTGTGGAAAACACCGCGCGCAAATCGGTGCCCGTGAAGTGATCGGCGACACCAAGATCGCCAAGG
TCTCGATCGTGGCGTCCGATGCGTTTCGCACGCCGTTGTTGCCAGCTGCATGTTCAAGCCCTGGCCAAGGAGAGCA
TCAACATCCAGATGATCTCCACTTCCGAGATCAAGGTTTTCGGTGGTGTCTCGAGAGAAGTACCTGGAGCTGGCCGTAC
GCGCGTGCATACCGCTTCGATCTGGATGCTCCTGCCGACAGGGCGAGTAAGGCGCTGCCTGGAAGGGCGCGGCTT
GCCGCGCCCTTCGCGTTTCTGCTCGCCGCGCAGGTCTGTCTGCCTTGTGCGGCGAGTAACCGGGCCATGGTCGTC
GTCCGCGACCCGGGCCGATATCCAAGACTGTTACCCCTGAATGTTTTGCGTAAGGAGAAAGCTATGTTGATTCTGAC
TCGTCGG ]

```

**Figure S6.** Transcriptional start sites (highlighted in turquoise) identified in *rsmI*, *rsmE* and *rsmA* by RACE. The ribosomal binding sites are underlined and start codons are highlighted yellow. Stop codons of upstream genes are shown in red. Fragments included in translational fusions with LacZ are indicated by purple square brackets. Sequences compatible with  $\sigma^{54}$ - and  $\sigma^{70}$ -dependent promoters in *rsmI* and *rsmE* are shaded in grey, with conserved bases in bold.
